# Supplementary material for: Study of the DNA binding mechanism and in vitro activity against cancer cells of iron(iii) and aluminium(iii) kojic acid derivative complexes
Source: Royal Society of Chemistry journal article supplement (doi:10.1039/d2dt00111j), 2022-01-01
Supplement: d2dt00111j1.pdf [file d2dt00111j1.pdf]

**Study of DNA binding mechanism and in vitro activity against cancer cells of iron(III) and aluminum(III) Kojic acid derivatives complexes.**

Joanna I. Lachowicz<sup>\*,1</sup>, Anna Mateddu<sup>1</sup>, Pierpaolo Coni<sup>1</sup>, Claudia Caltagirone<sup>2</sup>, Sergio Murgia<sup>3,4</sup>, Dan Gibson<sup>5</sup>, Gabriele dalla Torre<sup>6</sup>, Xabier Lopez<sup>6</sup>, Federico Meloni<sup>1</sup> and Giuseppina Pichiri<sup>\*,1</sup>.

1) *University of Cagliari, Department of Medical Sciences and Public Health, Cittadella Universitaria, 09042 Monserrato-Cagliari, Italy*

2) *University of Cagliari, Department of Chemical and Geological Science, Cittadella Universitaria, 09042 Monserrato-Cagliari, Italy*

3) *Department of Life and Environmental Sciences, University of Cagliari, via Ospedale 72, Cagliari I-09124, Italy*

4) *CSGI, Consorzio Interuniversitario per lo Sviluppo dei Sistemi a Grande Interfase, Via della Lastruccia 3, I-50019 Sesto Fiorentino, Florence, Italy.*

5) *Institute for Drug Research, School of Pharmacy, The Hebrew University of Jerusalem, 91120 Jerusalem, Israel*

6) *Donostia International Physics Centre (DIPC), PK 1072, 20080 Donostia, Euskadi, Spain*

## 1. Synthesis

### **(S2): 2,2'-[ethane-1,2-diylbis(iminomethanediyl)]bis(5-hydroxy-4H-pyran-4-one)**

1.0 g (7 mmol) of KA was dissolved in 20 mL of ethanol (96%) and 230  $\mu$ l (3.5 mmol) of ethylenediamine were added. After stirring the reaction mixture at room temperature for 1 h, the precipitate was filtered and washed with ethyl acetate. Sample identity and purity were confirmed by NMR analysis. Yield 98%, Melting Point 138–139 °C, Elemental Analysis: C<sub>14</sub>H<sub>16</sub>N<sub>2</sub>O<sub>6</sub> (MW 308,29) calculated C, 54.54%; H, 5.23%; N, 9.09, found C, 54.93%; H, 5.52%; N, 8.99%. <sup>1</sup>H NMR (400 MHz, H<sub>2</sub>O-D<sub>2</sub>O, 90%–10%, pH 6.2),  $\delta$  (ppm): 7.923 (s, 2H), 6.525 (s, 2H), 4.496 (s, 4H), 3.026 (s, 4H). <sup>13</sup>C NMR (100 MHz, D<sub>2</sub>O, pD~8.2),  $\delta$  (ppm): 179.51, 166.65, 149.23, 142.24, 110.25, 60.05, 39.37.

## 2. Hyss software theoretical calculations

Various computer programs have been developed to produce distribution diagrams for the species formed in solution, such as HYSS<sup>1</sup>. Species distribution curves represent the percentages (or partial mole fractions) or equilibrium concentrations of the different chemical species present in a solution under given conditions in a representative manner. Concentration distribution curves are generally presented as a function of a single variable, such as pH, where the fixed values of the components (reagents) uniquely determine the molar ratios of the species formed.

The theoretical competition studies were calculated on the base of S2 ligand and pyrophosphate anion protonation constants<sup>2</sup>, S2/pyrophosphate anion<sup>2</sup> and Al(III)/pyrophosphate anion<sup>3</sup> complex formation constants, and aluminium hydroxide species<sup>4</sup> [ref]. The obtained Species distribution diagram is shown in Figure S1.

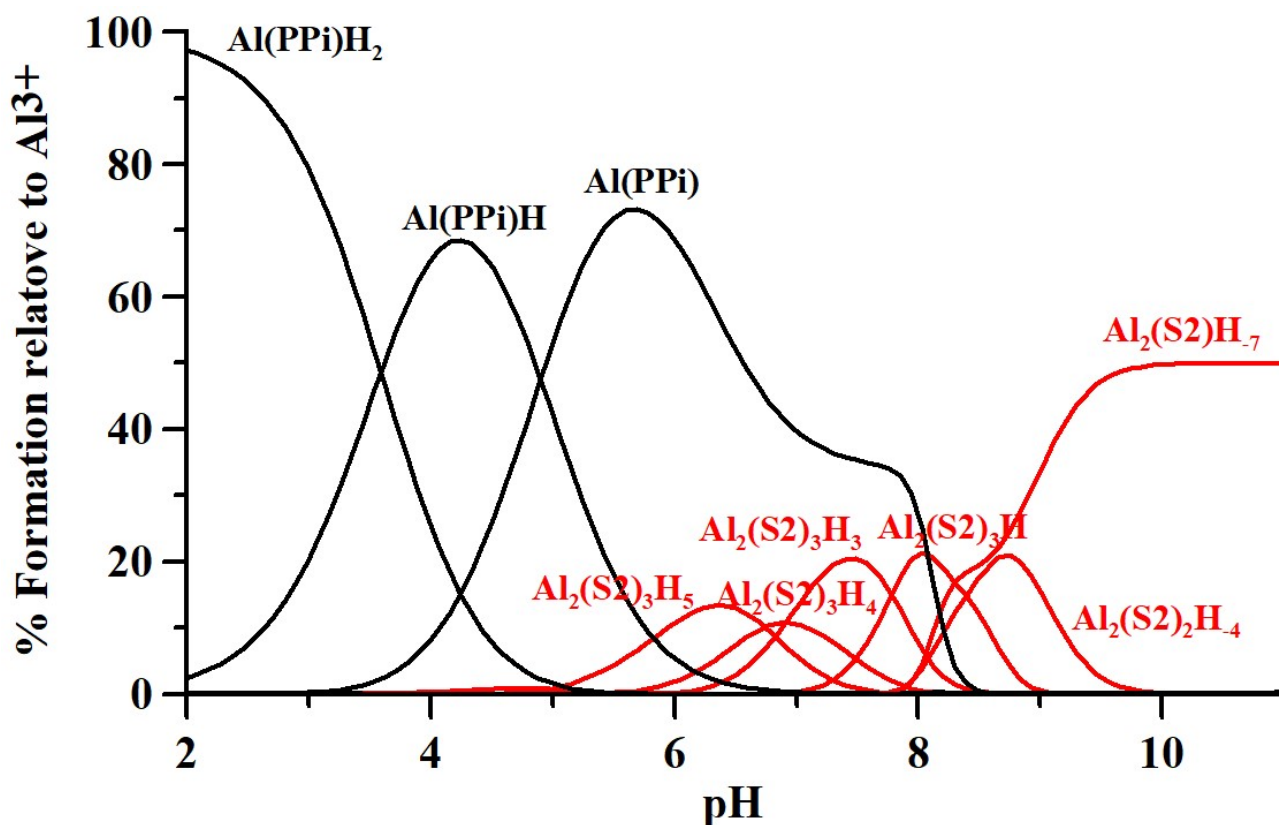

**Figure S1.** Theoretical competition studies between Al(III), pyrophosphate (PPi) and S2 ligand, calculated on the base of the ligand and anion protonation constants; and complex formation constants ( $\log\beta$ ) of S2 with pyrophosphate ion, S2 with Al(III) ions and aluminium with (PPi) ion. Concentrations were as follows:  $[S2]=[PPi]=[Al]=1.00\times 10^{-3}$  [M]. Al(III)-S2-PPi ternary complexes are not present due to the lack of the potentiometric data.

## References

1. L. Alderighi, P. Gans, A. Ienco, D. Peters, A. Sabatini and A. Vacca, *Coordination Chemistry Reviews*, 1999, **184**, 311-318.

2. Joanna I. Lachowicza, Debora Todde, Krystsina Aberamchuk, Giacomo Picci, Sergio Murgia, N. Valeria M, Marcin Klepka, Diana Kalinowska, Gabriele Dalla Torre, Joni Mujika, Xabier Lopez and C. Caltagirone, *Journal of Inorganic Biochemistry*, 2021, In press.
3. K. Atkári, T. Kiss, R. Bertani and R. B. Martin, *Inorganic Chemistry*, 1996, **35**, 7089-7094.
4. C. Baes Jr and R. Mesmer, *Google Scholar There is no corresponding record for this reference*.
